# Supplementary material
Source: Springer Nature journal article supplement (https://www.springermedizin.de/resource/supplementary/12913_2010_1374_MOESM5_ESM.pdf/9528000)

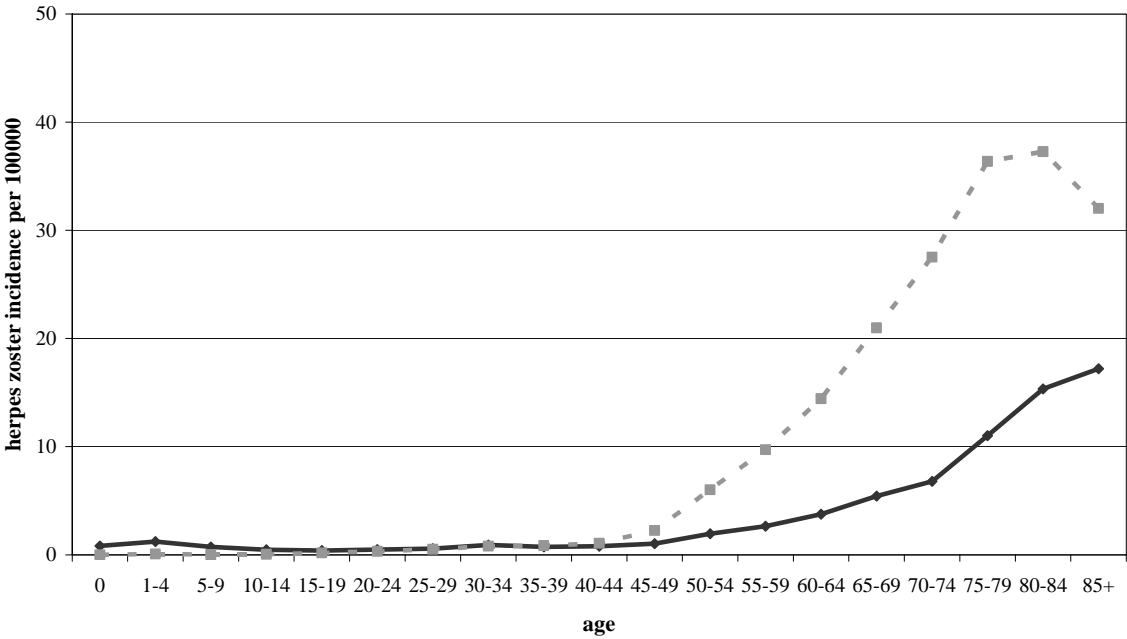

—◆— clinical admission - -■- admission for one day

Supplement: MOESM5 [file 9528000]
